# Supplementary material for: Photosensized Controlling Benzyl Methacrylate-Based Matrix Enhanced Eu3+ Narrow-Band Emission for Fluorescence Applications
Source: Int J Mol Sci. 2012 Mar 21;13(3):3718–37. doi: 10.3390/ijms13033718 (PMC3317738; doi:10.3390/ijms13033718)
Supplement: Supplementary file 1 [file ijms-13-03718-s001.pdf]

# Supporting Information

**Figure S1.** The molecular structure of Cl-MIP  $\text{CH}_2\text{Cl}_2$ , showing the atom-labeling scheme and thermal ellipsoids drawn at the 50% probability level.

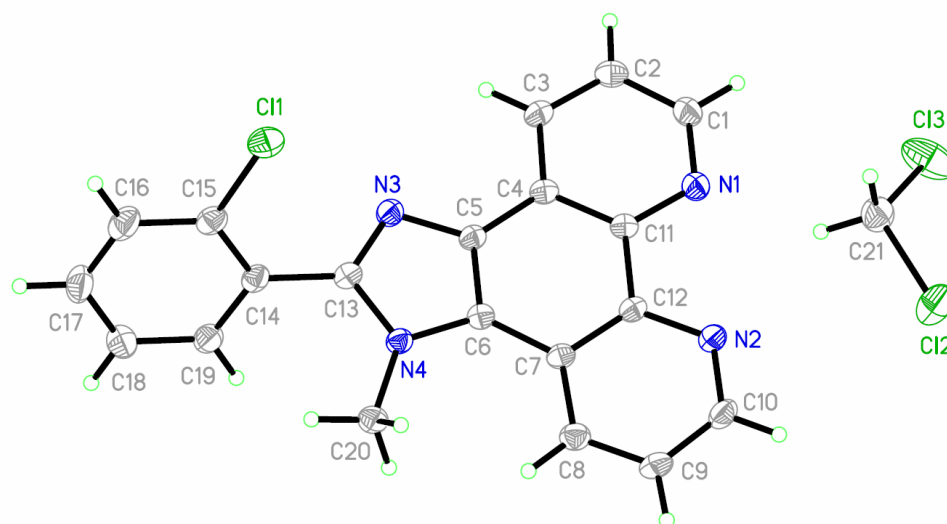

**Figure S2.** The packing of Cl-IP  $\text{CH}_2\text{Cl}_2$  views with b-axis. Dashed lines represent the hydrogen bonding.

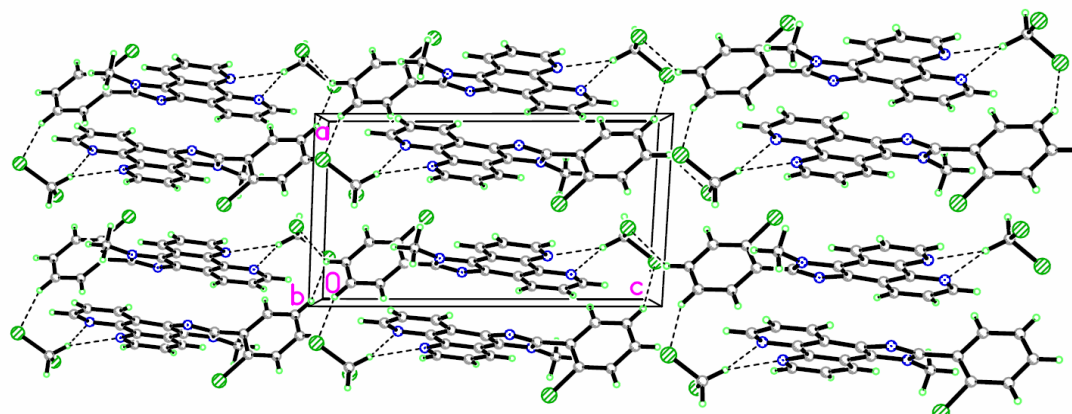

**Table S1.** Hydrogen Bonds for Cl-MIP [ $\text{\AA}$  & angle (degree)].

| D-H $\cdots$ A               | d(D-H) | d(H $\cdots$ A) | d(D $\cdots$ A) | $\angle(\text{DHA})$ |
|------------------------------|--------|-----------------|-----------------|----------------------|
| C(21)-H(21B) $\cdots$ N(1)   | 0.99   | 2.38            | 3.241(3)        | 145.1                |
| C(21)-H(21B) $\cdots$ N(2)   | 0.99   | 2.42            | 3.286(3)        | 145.9                |
| C(17)-H(17) $\cdots$ Cl(2)#1 | 0.95   | 2.82            | 3.588(2)        | 138.5                |
| C(18)-H(18) $\cdots$ Cl(3)#2 | 0.95   | 2.82            | 3.629(2)        | 144.1                |

Symmetry transformations used to generate equivalent atoms: #1  $x, y-1, z-1$ , #2  $-x, -y+1, -z+1$

**Table S2.** Crystal data and structure refinement for Cl-MIP·CH<sub>2</sub>Cl<sub>2</sub>

|                                   |                                                                                                        |
|-----------------------------------|--------------------------------------------------------------------------------------------------------|
| Identification code               | Cl-MIP·CH <sub>2</sub> Cl <sub>2</sub>                                                                 |
| Empirical formula                 | C <sub>21</sub> H <sub>15</sub> Cl <sub>3</sub> N <sub>4</sub>                                         |
| Formula weight                    | 429.72                                                                                                 |
| Temperature                       | 150(2) K                                                                                               |
| Wavelength                        | 0.71073 Å                                                                                              |
| Crystal system                    | Triclinic                                                                                              |
| Space group                       | P-1                                                                                                    |
| Unit cell dimensions              | a = 7.8827(5) Å = 89.3447(14) °<br>b = 8.7562(6) Å = 87.3009(15) °<br>c = 14.0231(9) Å = 79.1288(14) ° |
| Volume                            | 949.48(11) Å <sup>3</sup>                                                                              |
| Z                                 | 2                                                                                                      |
| Density (calculated)              | 1.503 Mg/m <sup>3</sup>                                                                                |
| Absorption coefficient            | 0.498 mm <sup>-1</sup>                                                                                 |
| F(000)                            | 440                                                                                                    |
| Crystal size                      | 0.40 × 0.38 × 0.14 mm <sup>3</sup>                                                                     |
| Theta range for data collection   | 1.45 to 27.50 °                                                                                        |
| Index ranges                      | -10 ≤ h ≤ 10, -11 ≤ k ≤ 11, -18 ≤ l ≤ 18                                                               |
| Reflections collected             | 12602                                                                                                  |
| Independent reflections           | 4349 [R(int) = 0.0311]                                                                                 |
| Completeness to theta = 27.50 °   | 99.3%                                                                                                  |
| Absorption correction             | Semi-empirical from equivalents                                                                        |
| Max. and min. transmission        | 0.9336 and 0.8257                                                                                      |
| Refinement method                 | Full-matrix least-squares on F <sup>2</sup>                                                            |
| Data / restraints / parameters    | 4349 / 0 / 254                                                                                         |
| Goodness-of-fit on F <sup>2</sup> | 1.116                                                                                                  |
| Final R indices [I > 2sigma(I)]   | R1 = 0.0427, wR2 = 0.1112                                                                              |
| R indices (all data)              | R1 = 0.0508, wR2 = 0.1227                                                                              |
| Largest diff. peak and hole       | 0.616 and -0.552 e.Å <sup>-3</sup>                                                                     |

**Table S3.** Crystal data and structure refinement for Eu(dbm)<sub>3</sub>Cl-MIP·CH<sub>2</sub>Cl<sub>2</sub>.

|                                   |                                                                                          |
|-----------------------------------|------------------------------------------------------------------------------------------|
| Identification code               | Eu(dbm) <sub>3</sub> Cl-MIP·CH <sub>2</sub> Cl <sub>2</sub>                              |
| Empirical formula                 | C <sub>66</sub> H <sub>48</sub> Cl <sub>3</sub> Eu N <sub>4</sub> O <sub>6</sub>         |
| Formula weight                    | 1251.39                                                                                  |
| Temperature                       | 150(2) K                                                                                 |
| Wavelength                        | 0.71073 Å                                                                                |
| Crystal system                    | Monoclinic                                                                               |
| Space group                       | P2(1)/c                                                                                  |
| Unit cell dimensions              | a = 12.2225(6) Å = 90 °<br>b = 20.7889(10) Å = 96.3883(10) °<br>c = 22.1103(11) Å = 90 ° |
| Volume                            | 5583.2(5) Å <sup>3</sup>                                                                 |
| Z                                 | 4                                                                                        |
| Density (calculated)              | 1.489 Mg/m <sup>3</sup>                                                                  |
| Absorption coefficient            | 1.325 mm <sup>-1</sup>                                                                   |
| F(000)                            | 2536                                                                                     |
| Crystal size                      | 0.40 × 0.25 × 0.25 mm <sup>3</sup>                                                       |
| Theta range for data collection   | 1.35 to 27.50 °                                                                          |
| Index ranges                      | -15 ≤ h ≤ 15, -25 ≤ k ≤ 27,<br>-28 ≤ l ≤ 28                                              |
| Reflections collected             | 42634                                                                                    |
| Independent reflections           | 12815 [R(int) = 0.0331]                                                                  |
| Completeness to theta = 27.50 °   | 99.9%                                                                                    |
| Absorption correction             | Semi-empirical from equivalents                                                          |
| Max. and min. transmission        | 0.7329 and 0.6192                                                                        |
| Refinement method                 | Full-matrix least-squares on F <sup>2</sup>                                              |
| Data / restraints / parameters    | 12815 / 0 / 722                                                                          |
| Goodness-of-fit on F <sup>2</sup> | 1.055                                                                                    |
| Final R indices [I > 2σ(I)]       | R1 = 0.0348, wR2 = 0.0790                                                                |
| R indices (all data)              | R1 = 0.0421, wR2 = 0.0831                                                                |
| Largest diff. peak and hole       | 1.096 and -0.971 e.Å <sup>-3</sup>                                                       |
